# Supplementary material
Source: MDPI journal article supplement (https://www.mdpi.com/2311-7524/7/8/210)
Supplement: s1 [file s1]

## Supplementary Materials

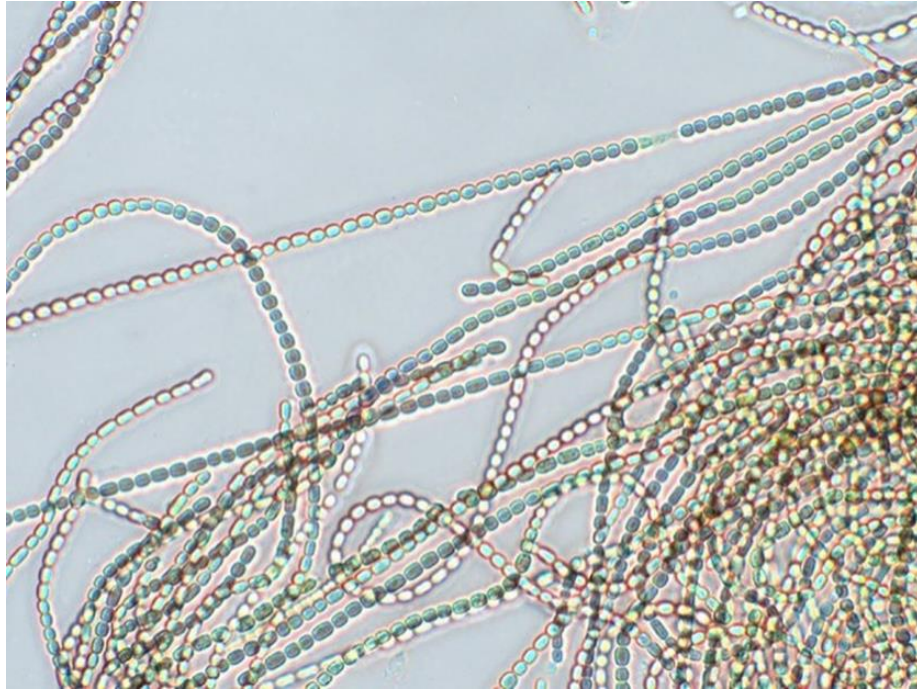

(a)

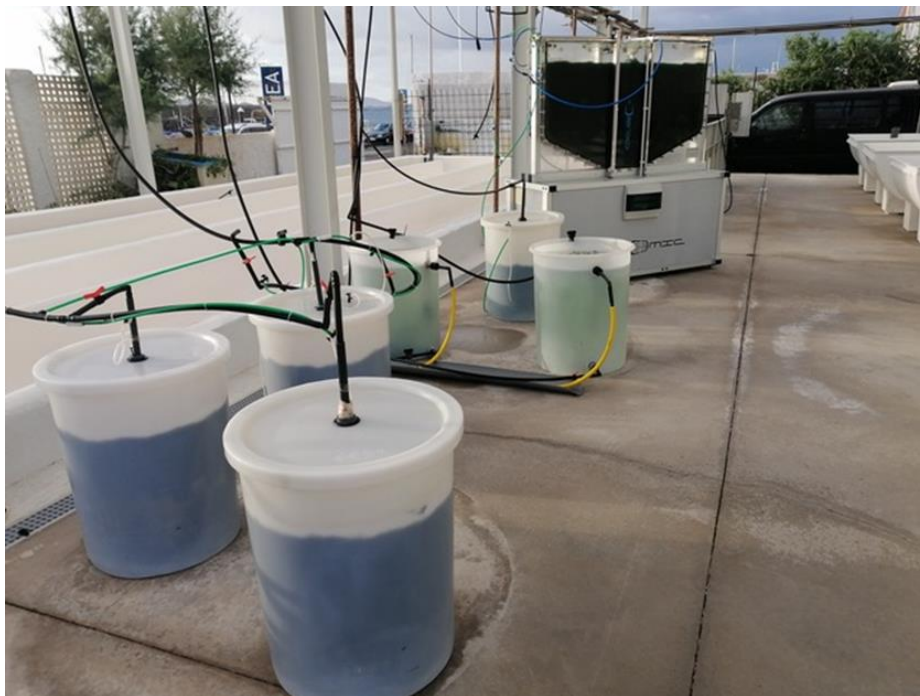

(b)

**Figure S1.** *Anabaena minutissima* BEA 0300B: microphoto, 40× (a) and cultivation in polypropylene tanks under an outdoor greenhouse (b) at the Spanish Bank of Algae BEA (Canary Islands, Spain).
